# Supplementary material for: Structural and electronic properties of ZnO/GaN heterostructured nanowires from first-principles study
Source: Royal Society of Chemistry journal article supplement (doi:10.1039/c5cp06564j), 2015-12-18
Supplement: c5cp06564j1.pdf [file c5cp06564j1.pdf]

## Supporting Information

### **Structural and electronic properties of ZnO/GaN heterostructured nanowires from first-principles study**

Yang Zhang,<sup>a\*</sup> Dang-Qi Fang,<sup>a</sup> Sheng-Li Zhang,<sup>a\*</sup> Rao Huang<sup>b</sup> and Yu-Hua Wen<sup>b</sup>

<sup>a</sup>Ministry of Education Key Laboratory for Nonequilibrium Synthesis and Modulation of  
Condensed Matter, Department of Applied Physics, Xi'an Jiaotong University, Xi'an 710049,  
China.

<sup>b</sup>Institute of Theoretical Physics and Astrophysics, Department of Physics, Xiamen University,  
Xiamen 361005, China.

#### Supporting figures:

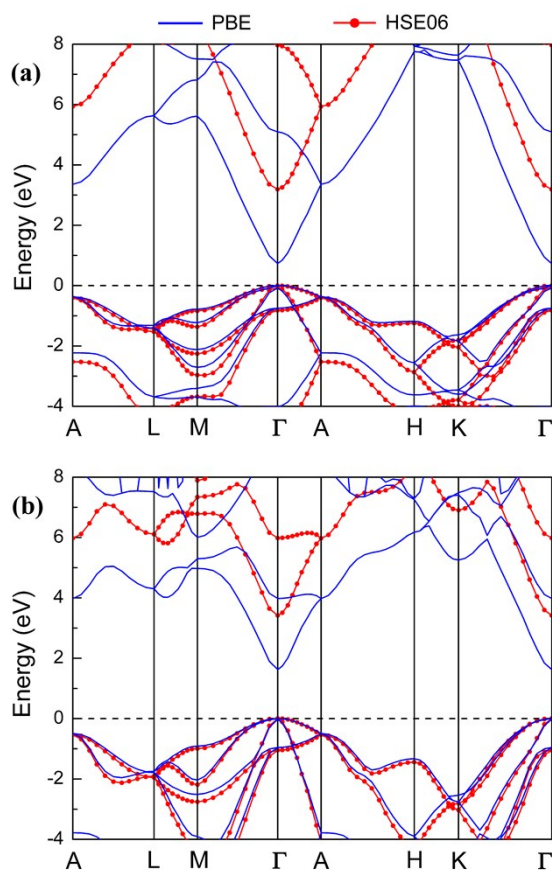

**Figure S1.** Electronic band structures of wurtzite (a) ZnO and (b) GaN bulks. The band structures denoted by blue solid and red solid-dot lines are calculated by using PBE functional and HSE06. The energy of highest occupied level is set to zero and denoted by the dash line.

---

\*Corresponding author.  
E-mail: yzhang520@mail.xjtu.edu.cn, zhangsl@mail.xjtu.edu.cn.

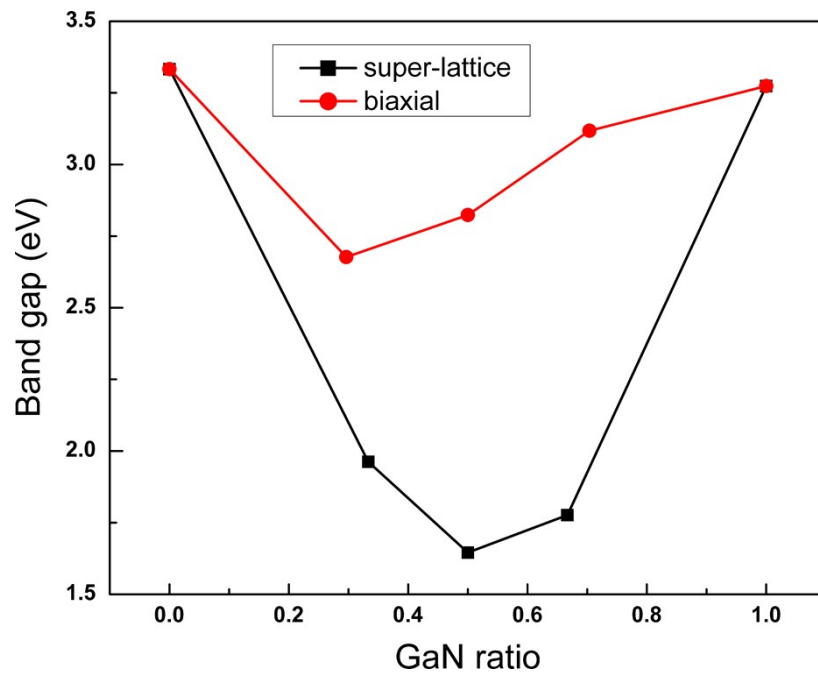

**Figure S2.** Band gaps calculated by HSE06 method as a function of GaN ratio for biaxial and super-lattice heterostructured nanowires with a diameter of 1.65 nm. The GaN ratios of 0.0 and 1.0 respectively represent the pure ZnO and GaN nanowires.
